# Supplementary material
Source: MDPI journal article supplement (https://www.mdpi.com/2227-9717/12/4/842)
Supplement: s1 [file s1]

Table S1. Comparison of urea, SCPU, and other SRFs in practical application.

| Sample                                                                                   | Source                               | Preparation price<br>(RMB·Kg <sup>-1</sup> ) | Total cost of planting season<br>(RMB·hm <sup>-1</sup> )                                                                                |
|------------------------------------------------------------------------------------------|--------------------------------------|----------------------------------------------|-----------------------------------------------------------------------------------------------------------------------------------------|
| Urea                                                                                     | Sinopharm Chemical reagent Co., Ltd. | 12                                           | RMB 8,400 (urea needs to be applied three times, with a total urea requirement of about RMB 5,400 and a total labor cost of RMB 3,000). |
| Slow-release urea fertilizer with water retention and photosensitivity properties (SCPU) | This research                        | 85                                           | RMB 13,750 (urea needs to be applied one time, with a total urea requirement of about RMB 12,750 and a total labor cost of RMB 1,000).  |
| Slow-release urea fertilizer with water retention (Starch phosphate carbamate hydrogel)  | G. Dong et al. [41]                  | 226                                          | RMB 34,900 (urea needs to be applied one time, with a total urea requirement of about RMB 33,900 and a total labor cost of RMB 1,000).  |
